# Supplementary material for: Is Mycobacterium tuberculosis infection life long?
Source: PubMed Central journal article supplement (PMC6812595; doi:10.1136/bmj.l5770), 2019-10-24
Supplement: behm050761.ww1.pdf [file behm050761.ww1.pdf]

Supplemental Table 1

| Type of immunosuppression          | Active TB (%)    | 95% CI   | N total/TST+ only         | TST+ prevalence (%) | TB disease (N)  | Data adjusted for: |                   | Observation period                                     |
|------------------------------------|------------------|----------|---------------------------|---------------------|-----------------|--------------------|-------------------|--------------------------------------------------------|
|                                    |                  |          |                           |                     |                 | IPT <sup>a</sup>   | Strain clustering |                                                        |
| <b>antiTNF (infliximab)</b>        |                  |          |                           |                     |                 |                    |                   |                                                        |
| US <sup>1</sup>                    | 0.7              | 0.2-1.8  | 6460/594                  | 9                   | 4               | no                 | no                | 1-3 years                                              |
| US <sup>2</sup>                    | 0.6              | 0.4-0.9  | 121,000/2,833             | 4.2 <sup>b</sup>    | 17 <sup>c</sup> | no                 | no                | 2 years                                                |
| France <sup>3</sup>                | 1.0 <sup>d</sup> | 0.6-1.8  | unknown/1154 <sup>e</sup> | 22 <sup>f</sup>     | 12 <sup>d</sup> | no                 | no                | 2-5 years                                              |
| Spain <sup>4</sup>                 | 4.9              | 3 to 7.8 | 1540/347 <sup>e</sup>     | 22 <sup>g</sup>     | 17              | no                 | no                | 1.1 years                                              |
|                                    |                  |          |                           |                     |                 |                    |                   |                                                        |
| <b>SOT</b>                         |                  |          |                           |                     |                 |                    |                   |                                                        |
| Turkey kidney <sup>5</sup>         | 11.3             | 7.4-17   | 443/177 <sup>e</sup>      | 40 <sup>h</sup>     | 20              | no                 | no                | 15 months for 1 grp, 55 months for 2 <sup>nd</sup> grp |
| US kidney <sup>6</sup>             | 9.9              | 7.9-12.4 | 15,870/666 <sup>e</sup>   | 4.2 <sup>b</sup>    | 66              | no                 | no                | 1.6 years                                              |
| Spain multiple organs <sup>7</sup> | 4.4              | 2.9-6.8  | 4388/471                  | 19                  | 21              | yes                | no                | 1 year                                                 |
|                                    |                  |          |                           |                     |                 |                    |                   |                                                        |
| <b>HIV/AIDS (US)</b>               |                  |          |                           |                     |                 |                    |                   |                                                        |
| US <sup>8</sup>                    | 2.9              | 0.0-15.8 | /35                       | 100 <sup>i</sup>    | 1 <sup>j</sup>  | no                 | yes               | 5 years                                                |
| US <sup>9</sup>                    | 11.3             | 6.5-19.0 | 466/106                   | 25                  | 12              | yes                | yes               | 5 years                                                |
|                                    |                  |          |                           |                     |                 |                    |                   |                                                        |
| <b>HSCT</b>                        |                  |          |                           |                     |                 |                    |                   |                                                        |
| Taiwan <sup>10</sup>               | 8.0              | 5.8-10.7 | 2040/492 <sup>e</sup>     | 24 <sup>k</sup>     | 39              | no                 | no                | 10 years                                               |
| US <sup>11</sup>                   | 0                | 0.0-14.0 | 29/29                     | 100 <sup>i</sup>    | 0               | Yes (none treated) | no                | 5 years                                                |
| Korea <sup>12</sup>                | 10.3             | 6.4-16.2 | 550/155 <sup>e</sup>      | 28 <sup>l</sup>     | 16              | no (none treated)  | no                | 5.8 years                                              |
| India <sup>13</sup>                | 7.1              | 2.8-16.1 | 175/70 <sup>e</sup>       | 40 <sup>m</sup>     | 5               | no (none treated)  | no                | 3.1 years                                              |

#### Footnotes

a, INH preventive therapy; b, estimated TST positive prevalence based on US average in 1999-2000<sup>14</sup>; c, US patients only, as this was the population for which TB disease rates were determined; d, only patients from 2000 are included because after that INH preventive therapy was given to some or most TST-positive patients; e, estimated number of tuberculin skin test (TST)-positive persons based on number of those with TB and on the % of TST-positive people with active TB; f, estimated TST positive prevalence based on a 2005-2009 French study<sup>15</sup> of patients with chronic inflammatory arthritis who were candidates for biologic therapy, where the T-spot positive prevalence were taken as the more specific figure; g, TST prevalence in a later study of Spanish patients with rheumatologic diseases undergoing skin testing prior to infliximab therapy<sup>16</sup>; h, IGRA-positive prevalence in a study of Turkish patients undergoing testing prior to biologic therapy for inflammatory bowel disease<sup>17</sup>; i, only TST-positive patients were studied; j, of 6 patients with TB, five were clustered, indicating recent infection, not activation of remote TB infection; k, TST+ prevalence is based on the IGRA-positive prevalence of Taiwanese persons<sup>18</sup>; l, IGRA-positive prevalence of HSCT patients in same hospital a few years later<sup>12</sup>; m, TB infection prevalence cited in paper regarding the Indian population, not specifically the study group

## References

1. Wolfe F, Michaud K, Anderson J, Urbansky K. Tuberculosis infection in patients with rheumatoid arthritis and the effect of infliximab therapy. *Arthritis Rheum* 2004;50:372-9.
2. Keane J, Gershon S, Wise RP, et al. Tuberculosis associated with infliximab, a tumor necrosis factor alpha-neutralizing agent. *N Engl J Med* 2001;345:1098-104.
3. Baldin B, Dozol A, Spreux A, Chichmanian RM. Tuberculoses lors de traitements par l'infliximab. Suivi national du 1er janvier 2000 au 30 juin 2003. *Presse Med* 2005;34:353-7.
4. Gomez-Reino JJ, Carmona L, Valverde VR, Mola EM, Montero MD, Group B. Treatment of rheumatoid arthritis with tumor necrosis factor inhibitors may predispose to significant increase in tuberculosis risk: a multicenter active-surveillance report. *Arthritis Rheum* 2003;48:2122-7.
5. Atasever A, Bacakoglu F, Toz H, et al. Tuberculosis in renal transplant recipients on various immunosuppressive regimens. *Nephrol Dial Transplant* 2005;20:797-802.
6. Klote MM, Agodoa LY, Abbott K. Mycobacterium tuberculosis infection incidence in hospitalized renal transplant patients in the United States, 1998-2000. *Am J Transplant* 2004;4:1523-8.
7. Torre-Cisneros J, Doblaz A, Aguado JM, et al. Tuberculosis after solid-organ transplant: incidence, risk factors, and clinical characteristics in the RESITRA (Spanish Network of Infection in Transplantation) cohort. *Clin Infect Dis* 2009;48:1657-65.
8. Moss AR, Hahn JA, Tulsy JP, Daley CL, Small PM, Hopewell PC. Tuberculosis in the homeless. A prospective study. *Am J Respir Crit Care Med* 2000;162:460-4.
9. Horsburgh CR, Jr., O'Donnell M, Chamblee S, et al. Revisiting rates of reactivation tuberculosis: a population-based approach. *Am J Respir Crit Care Med* 2010;182:420-5.
10. Fan WC, Liu CJ, Hong YC, et al. Long-term risk of tuberculosis in haematopoietic stem cell transplant recipients: a 10-year nationwide study. *Int J Tuberc Lung Dis* 2015;19:58-64.
11. Cheng MP, Kusztoz AE, Bold TD, et al. Risk of Latent Tuberculosis Reactivation after Hematopoietic-Cell Transplantation. *Clin Infect Dis* 2019;in press.
12. Lee HJ, Lee DG, Choi SM, et al. The demanding attention of tuberculosis in allogeneic hematopoietic stem cell transplantation recipients: High incidence compared with general population. *PLoS One* 2017;12:e0173250.
13. Agrawal N, Aggarwal M, Kapoor J, et al. Incidence and clinical profile of tuberculosis after allogeneic stem cell transplantation. *Transpl Infect Dis* 2018;20:e12794.
14. Bennett DE, Courval JM, Onorato I, et al. Prevalence of tuberculosis infection in the United States population: the national health and nutrition examination survey, 1999-2000. *Am J Respir Crit Care Med* 2008;177:348-55.

15. Costantino F, de Carvalho Bittencourt M, Rat AC, et al. Screening for latent tuberculosis infection in patients with chronic inflammatory arthritis: discrepancies between tuberculin skin test and interferon-gamma release assay results. *J Rheumatol* 2013;40:1986-93.
16. Gomez-Reino JJ, Carmona L, Angel Descalzo M, Biobadaser G. Risk of tuberculosis in patients treated with tumor necrosis factor antagonists due to incomplete prevention of reactivation of latent infection. *Arthritis Rheum* 2007;57:756-61.
17. Cekic C, Aslan F, Vatansever S, et al. Latent tuberculosis screening tests and active tuberculosis infection rates in Turkish inflammatory bowel disease patients under anti-tumor necrosis factor therapy. *Ann Gastroenterol* 2015;28:241-6.
18. Fan WC, Ting WY, Lee MC, et al. Latent TB infection in newly diagnosed lung cancer patients - A multicenter prospective observational study. *Lung Cancer* 2014;85:472-8.
