# Supplementary material for: Is Mycobacterium tuberculosis infection life long?
Source: PubMed Central journal article supplement (PMC6812595; doi:10.1136/bmj.l5770), 2019-10-24
Supplement: behm050761.ww3.pdf [file behm050761.ww3.pdf]

Supplemental Table 2

BCG vaccination policies<sup>a</sup> and possible effect of BCG vaccine on TB prevalence estimates

| Type of immunosuppression          | BCG vaccine used?        | BCG vaccination stopped | BCG given <1 yr | BCG boosters >1 yr | Tuberculin reactivity assay positive with BCG boosters >1 yr <sup>1</sup> | Effect of BCG vaccination on TB prevalence estimate |
|------------------------------------|--------------------------|-------------------------|-----------------|--------------------|---------------------------------------------------------------------------|-----------------------------------------------------|
| <b>antiTNF</b>                     |                          |                         |                 |                    |                                                                           |                                                     |
| US <sup>2</sup>                    | no                       | NA                      | NA              | NA                 | no (no BCG)                                                               | none                                                |
| US <sup>3</sup>                    | no                       | NA                      | NA              | NA                 | no (no BCG)                                                               | none                                                |
| France <sup>4</sup>                | yes                      | 2007                    | yes             | no                 | no (Tspot) <sup>5, b</sup>                                                | none                                                |
| Spain <sup>6</sup>                 | yes                      | 1981                    | yes             | no                 | no (no boosters used)                                                     | none                                                |
|                                    |                          |                         |                 |                    |                                                                           |                                                     |
| <b>SOT</b>                         |                          |                         |                 |                    |                                                                           |                                                     |
| Turkey kidney <sup>7</sup>         | yes                      | no                      | yes             | until 2006         | no (IGRA) <sup>5, c</sup>                                                 | none                                                |
| US kidney <sup>8</sup>             | no                       | NA                      | NA              | NA                 | no (no BCG)                                                               | none                                                |
| Spain multiple organs <sup>9</sup> | yes                      | 1981                    | yes             | no                 | no (no boosters used)                                                     | none                                                |
|                                    |                          |                         |                 |                    |                                                                           |                                                     |
| <b>HIV/AIDS (US)</b>               |                          |                         |                 |                    |                                                                           |                                                     |
| US <sup>10</sup>                   | no (90% US born)         | NA                      | NA              | NA                 | no (no BCG)                                                               | none                                                |
| US <sup>11</sup>                   | yes – Haitians only data | no (Haiti)              | yes (Haiti)     | no (Haiti)         | no (no boosters used in Haiti)                                            | none                                                |
|                                    |                          |                         |                 |                    |                                                                           |                                                     |
| <b>HSCT</b>                        |                          |                         |                 |                    |                                                                           |                                                     |
| Taiwan <sup>12</sup>               | yes                      | no                      | yes             | until 1997         | no (IGRA) <sup>d</sup>                                                    | none                                                |

|                     |     |    |     |            |                        |      |
|---------------------|-----|----|-----|------------|------------------------|------|
| US <sup>13</sup>    | no  | NA | NA  | NA         | no (no BCG)            | none |
| Korea <sup>14</sup> | yes | no | yes | until 2007 | no (IGRA) <sup>e</sup> | none |
| India <sup>15</sup> | yes | no | yes | no         | no (no boosters used)  | none |

#### Footnotes

a, BCG vaccination policies were obtained from the BCG World Atlas (<http://bcgatlas.org/index.php>); b, estimated TST positive prevalence based on a 2005-2009 French study<sup>16</sup> of patients with chronic inflammatory arthritis who were candidates for biologic therapy, where the T-spot positive prevalence were taken as the more specific figure; c, IGRA-positive prevalence in a study of Turkish patients undergoing testing prior to biologic therapy for inflammatory bowel disease<sup>17</sup>; d, TST+ prevalence is based on the IGRA-positive prevalence of Taiwanese persons<sup>18</sup>; e, IGRA-positive prevalence of HSCT patients in same hospital a few years later<sup>14</sup>

#### References

1. Farhat M, Greenaway C, Pai M, Menzies D. False-positive tuberculin skin tests: what is the absolute effect of BCG and non-tuberculous mycobacteria? *Int J Tuberc Lung Dis* 2006;10:1192-204.
2. Wolfe F, Michaud K, Anderson J, Urbansky K. Tuberculosis infection in patients with rheumatoid arthritis and the effect of infliximab therapy. *Arthritis Rheum* 2004;50:372-9.
3. Keane J, Gershon S, Wise RP, et al. Tuberculosis associated with infliximab, a tumor necrosis factor alpha-neutralizing agent. *N Engl J Med* 2001;345:1098-104.
4. Baldin B, Dozol A, Spreux A, Chichmanian RM. Tubercloses lors de traitements par l'infliximab. Suivi national du 1er janvier 2000 au 30 juin 2003. *Presse Med* 2005;34:353-7.
5. Pai M, Denkinger CM, Kik SV, et al. Gamma interferon release assays for detection of Mycobacterium tuberculosis infection. *Clin Microbiol Rev* 2014;27:3-20.
6. Gomez-Reino JJ, Carmona L, Valverde VR, Mola EM, Montero MD, Group B. Treatment of rheumatoid arthritis with tumor necrosis factor inhibitors may predispose to significant increase in tuberculosis risk: a multicenter active-surveillance report. *Arthritis Rheum* 2003;48:2122-7.
7. Atasever A, Bacakoglu F, Toz H, et al. Tuberculosis in renal transplant recipients on various immunosuppressive regimens. *Nephrol Dial Transplant* 2005;20:797-802.
8. Klote MM, Agodoa LY, Abbott K. Mycobacterium tuberculosis infection incidence in hospitalized renal transplant patients in the United States, 1998-2000. *Am J Transplant* 2004;4:1523-8.

9. Torre-Cisneros J, Doblaz A, Aguado JM, et al. Tuberculosis after solid-organ transplant: incidence, risk factors, and clinical characteristics in the RESITRA (Spanish Network of Infection in Transplantation) cohort. *Clin Infect Dis* 2009;48:1657-65.
10. Moss AR, Hahn JA, Tulsy JP, Daley CL, Small PM, Hopewell PC. Tuberculosis in the homeless. A prospective study. *Am J Respir Crit Care Med* 2000;162:460-4.
11. Horsburgh CR, Jr., O'Donnell M, Chamblee S, et al. Revisiting rates of reactivation tuberculosis: a population-based approach. *Am J Respir Crit Care Med* 2010;182:420-5.
12. Fan WC, Liu CJ, Hong YC, et al. Long-term risk of tuberculosis in haematopoietic stem cell transplant recipients: a 10-year nationwide study. *Int J Tuberc Lung Dis* 2015;19:58-64.
13. Cheng MP, Kusztoz AE, Bold TD, et al. Risk of Latent Tuberculosis Reactivation after Hematopoietic-Cell Transplantation. *Clin Infect Dis* 2019;in press.
14. Lee HJ, Lee DG, Choi SM, et al. The demanding attention of tuberculosis in allogeneic hematopoietic stem cell transplantation recipients: High incidence compared with general population. *PLoS One* 2017;12:e0173250.
15. Agrawal N, Aggarwal M, Kapoor J, et al. Incidence and clinical profile of tuberculosis after allogeneic stem cell transplantation. *Transpl Infect Dis* 2018;20:e12794.
16. Costantino F, de Carvalho Bittencourt M, Rat AC, et al. Screening for latent tuberculosis infection in patients with chronic inflammatory arthritis: discrepancies between tuberculin skin test and interferon-gamma release assay results. *J Rheumatol* 2013;40:1986-93.
17. Cekic C, Aslan F, Vatansever S, et al. Latent tuberculosis screening tests and active tuberculosis infection rates in Turkish inflammatory bowel disease patients under anti-tumor necrosis factor therapy. *Ann Gastroenterol* 2015;28:241-6.
18. Fan WC, Ting WY, Lee MC, et al. Latent TB infection in newly diagnosed lung cancer patients - A multicenter prospective observational study. *Lung Cancer* 2014;85:472-8.
